# Supplementary material
Source: PubMed Central journal article supplement (PMC3831309)

Figure 3 Source Data

B

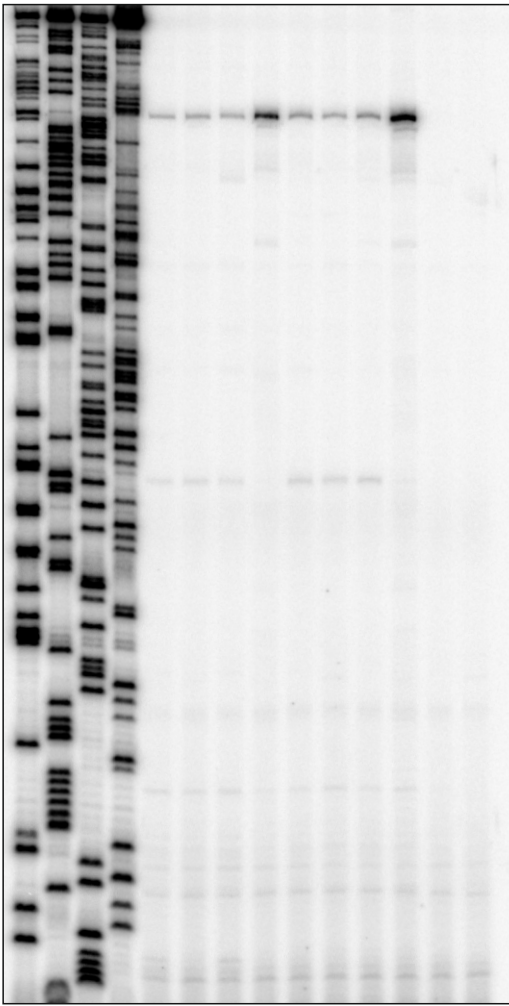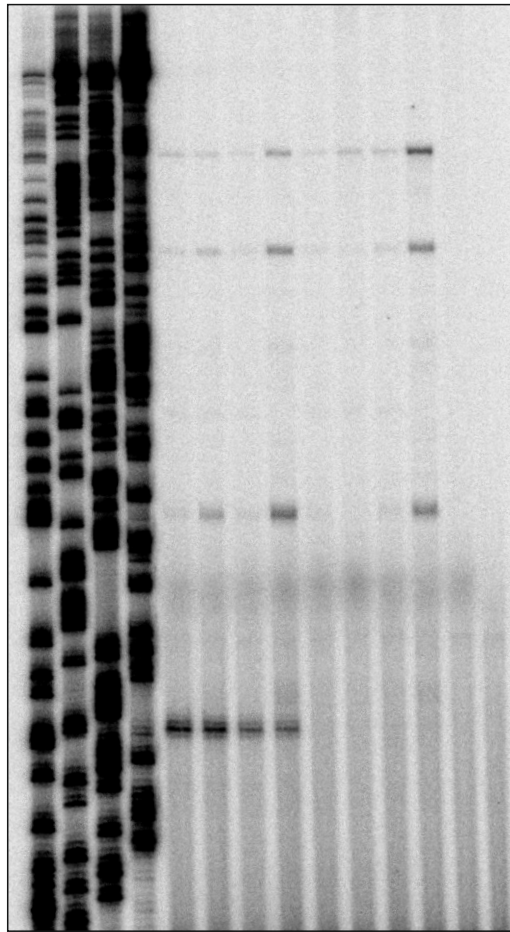

D

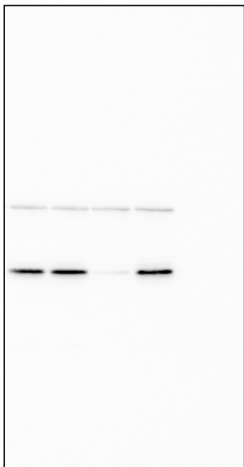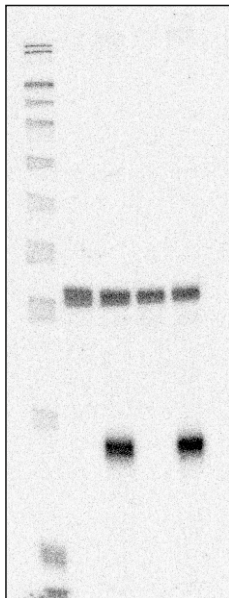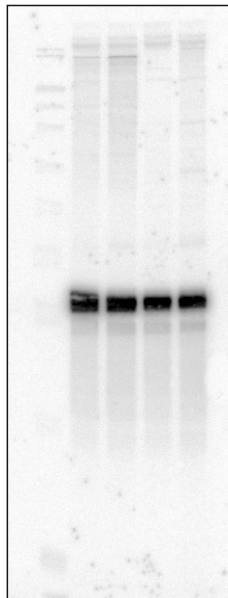

Supplement: emboj2013222df3.pdf [file emboj2013222df3.pdf]
